# Supplementary material for: Detection of Porcine Respirovirus 1 (PRV1) in Poland: Incidence of Co-Infections with Influenza A Virus (IAV) and Porcine Reproductive and Respiratory Syndrome Virus (PRRSV) in Herds with a Respiratory Disease
Source: MDPI journal article supplement (doi:10.3390/v14010148), 2022-01-14
Supplement: s1 [file s1]

**Supplementary Table S1:** Localization of 30 tested Polish pig farms and proportion of PRV1-positive NS and OF.

| Farm ID | Producer | Type of production  | Localization      |              | % of PRV1-positive samples (number of positives/number of tested) |                |
|---------|----------|---------------------|-------------------|--------------|-------------------------------------------------------------------|----------------|
|         |          |                     | Province          | District     | NS                                                                | OF             |
| A1      | A        | Farrow-to-finish    | Lubusz            | wschowski    | 28.6<br>(2/7)                                                     | 14.3<br>(1/7)  |
| B2      | B        | Nursery             | West Pomerania    | gryfiński    | 50.0<br>(2/4)                                                     | 50.0<br>(2/4)  |
| B3      | B        | Fattening           | Greater Poland    | złotowski    | 33.3<br>(1/3)                                                     | -<br>(0/3)     |
| B4      | B        | Multiplicating farm | Pomerania         | człuchowski  | 14.3<br>(1/7)                                                     | 28.6<br>(2/7)  |
| B5      | B        | Nursery             | Greater Poland    | nowotomyski  | 75.0<br>(3/4)                                                     | 75.0<br>(3/4)  |
| B6      | B        | Multiplicating farm | Pomerania         | człuchowski  | 28.6<br>(2/7)                                                     | 20.0<br>(1/5)  |
| B7      | B        | Fattening           | Pomerania         | człuchowski  | 33.3<br>(1/3)                                                     | 66.6<br>(2/3)  |
| B12     | B        | Nursery             | Pomerania         | człuchowski  | 75.0<br>(3/4)                                                     | not tested     |
| B13     | B        | Multiplicating farm | Pomerania         | człuchowski  | -<br>(0/7)                                                        | 14.3<br>(1/7)  |
| B14     | B        | Nursery             | Pomerania         | człuchowski  | 25.0<br>(1/4)                                                     | 25.0<br>(1/4)  |
| B15     | B        | Nursery             | Pomerania         | człuchowski  | 75.0<br>(3/4)                                                     | 75.0<br>(3/4)  |
| B16     | B        | Nursery             | West Pomerania    | łobeski      | 25.0<br>(1/4)                                                     | 33.3<br>(1/3)  |
| B17     | B        | Nursery             | West Pomerania    | choszczeński | 25.0<br>(1/4)                                                     | 25.0<br>(1/4)  |
| B18     | B        | Fattening           | West Pomerania    | białogardzki | -<br>(0/3)                                                        | 33.3<br>(1/3)  |
| B19     | B        | Fattening           | West Pomerania    | koszaliński  | -<br>(0/3)                                                        | 33.3<br>(1/3)  |
| B20     | B        | Fattening           | Pomerania         | człuchowski  | -<br>(0/3)                                                        | 33.3<br>(1/3)  |
| B24     | B        | Multiplicating farm | Kuyavia-Pomerania | sępoleński   | -<br>(0/7)                                                        | -<br>(0/7)     |
| B25     | B        | Fattening           | West Pomerania    | koszaliński  | -<br>(0/3)                                                        | -<br>(0/3)     |
| C8      | C        | Farrow-to-finish    | Kuyavia-Pomerania | lipnowski    | 60.0<br>(3/5)                                                     | 100.0<br>(4/4) |
| D9      | D        | Farrow-to-finish    | Silesia           | lubliniecki  | 100.0<br>(4/4)                                                    | 100.0<br>(3/3) |
| E10     | E        | Farrow-to-finish    | Lodz              | tomaszowski  | 14.3<br>(1/7)                                                     | 28.6<br>(2/7)  |
| F11     | F        | Farrow-to-finish    | Lodz              | tomaszowski  | 60.0<br>(3/5)                                                     | 50.0<br>(2/4)  |
| G21     | G        | Farrow-to-finish    | Lodz              | tomaszowski  | 50.0<br>(3/6)                                                     | 50.0<br>(3/6)  |
| H22     | H        | Farrow-to-finish    | Mazovia           | miński       | 25.0<br>(1/4)                                                     | 100.0<br>(3/3) |
| I23     | I        | Farrow-to-finish    | Opole             | oleski       | 80.0<br>(4/5)                                                     | 14.3<br>(1/7)  |

|     |   |                  |         |             |            |            |
|-----|---|------------------|---------|-------------|------------|------------|
| J26 | J | Farrow-to-finish | Lodz    | zgierski    | -<br>(0/6) | -<br>(0/6) |
| K27 | K | Farrow-to-finish | Mazovia | sokołowski  | -<br>(0/7) | -<br>(0/7) |
| L28 | L | Farrow-to-finish | Opole   | kluczborski | -<br>(0/5) | -<br>(0/5) |
| M29 | M | Farrow-to-finish | Opole   | kluczborski | -<br>(0/5) | -<br>(0/5) |
| N30 | N | Nursery          | Lodz    | piotrkowski | -<br>(0/4) | -<br>(0/4) |

PRV1 – porcine respirovirus 1; NS – nasal swabs pool; OF – oral fluid  
- - PRV1-negative samples
